# Supplementary material
Source: publisher figshare collection journal article supplement (https://sage.figshare.com/ndownloader/files/15254384)
Supplement: Supplementary file 1 [file 15254384]

***Supporting Informations***

**Novel Synthesis of Highly Functionalized Cyclopentane Derivatives *via* [3+2] Cycloaddition Reactions of D-A cyclopropanes and 3-Aryl-2-cyanoacrylates**

Chenlu Dai, Mingshuang Li, Mengjun Chen, Naili Luo and Cunde Wang*

School of Chemistry and Chemical Engineering, Yangzhou University,180 Siwangting Street, Yangzhou 225002, P. R. China. Fax: +86-514-8797-5244; Tel: +86-514-8797-5568; E-mail: [wangcd@yzu.edu.cn](mailto:wangcd@yzu.edu.cn)

**CONTENTS**

1. Crystal data of 1,3-dicyanocyclopentane-1,3-dicarboxylate **3d**.........................S2

2. Crystal data of 1,3-dicyanocyclopentane-1,3-dicarboxylate **3g**..........................S12

Figure **S1** Molecular structure of 1,3-dicyanocyclopentane-1,3-dicarboxylate **3d**, Non-hydrogen atoms are shown at the 30% probability level.

Table S1. Crystal data and structure refinement for **3d**.

Identification code **3d**

Empirical formula C32 H26 Cl2 N2 O5

Formula weight 589.45

Temperature 298 K

Wavelength 0.71073 A

Crystal system, space group Triclinic, P-1

Unit cell dimensions a = 7.7854(13) A alpha = 82.238(6) deg.

b = 10.0986(19) A beta = 84.538(5) deg.

c = 19.162(3) A gamma = 82.582(6) deg.

Volume 1475.6(4) A^3

Z, Calculated density 2, 1.327 Mg/m^3

Absorption coefficient 0.263 mm^-1

F(000) 612

Crystal size 0.35 x 0.33 x 0.3 mm

Theta range for data collection 1.08 to 27.45 deg.

Limiting indices -10<=h<=10, -13<=k<=13, -24<=l<=24

Reflections collected / unique 22777 / 6752 [R(int) = 0.1144]

Completeness to theta = 27.45 98.5 %

Absorption correction None

Refinement method Full-matrix least-squares on F^2

Data / restraints / parameters 6654 / 0 / 372

Goodness-of-fit on F^2 1.063

Final R indices [I>2sigma(I)] R1 = 0.1280, wR2 = 0.3547

R indices (all data) R1 = 0.2663, wR2 = 0.4300

Largest diff. peak and hole 2.709 and -0.973 e.A^-3

Table S2. Atomic coordinates ( x 10^4) and equivalent isotropic

displacement parameters (A^2 x 10^3) for **3d**.

U(eq) is defined as one third of the trace of the orthogonalized

Uij tensor.

________________________________________________________________

x y z U(eq)

________________________________________________________________

Cl(1) -3767(3) 6556(2) 2140(1) 87(1)

O(5) 6926(5) 522(4) 1570(2) 50(1)

O(4) 7219(5) 2188(4) 2200(2) 54(1)

C(5) 4711(7) 352(6) 3444(3) 38(1)

O(2) -46(7) 2977(5) 3877(2) 66(2)

C(7) 4013(7) 1565(5) 2965(3) 32(1)

O(1) 1838(7) 2905(6) 870(2) 73(2)

C(9) 4406(7) 1548(5) 2153(3) 34(1)

C(10) -847(7) 4821(6) 2248(3) 41(2)

O(3) 2689(7) 3345(5) 3958(3) 69(2)

C(12) 6358(7) 1462(6) 1978(3) 36(1)

C(13) 3233(9) 3020(7) 1078(3) 45(2)

N(2) 3039(7) -348(6) 1687(3) 57(2)

C(15) 892(8) 4441(6) 2389(3) 39(1)

C(16) 920(8) 977(6) 3128(3) 38(1)

C(17) 3665(7) 426(6) 1893(3) 35(1)

N(1) 93(8) 134(6) 3168(3) 61(2)

C(19) 3420(7) 2910(6) 1878(3) 36(1)

C(20) 4815(9) 3192(6) 588(3) 45(2)

C(21) 2020(8) 2084(6) 3046(3) 39(2)

C(22) 1603(10) 2864(7) 3698(4) 54(2)

C(23) 5893(8) 541(7) 3901(3) 44(2)

C(24) 1674(7) 3024(5) 2324(3) 35(1)

C(25) -1613(8) 6085(6) 2347(4) 47(2)

C(26) 1786(9) 5398(6) 2613(4) 53(2)

C(27) -720(9) 7033(6) 2577(4) 58(2)

C(28) 4283(9) -946(6) 3429(3) 51(2)

C(29) 6623(9) -570(8) 4366(3) 54(2)

C(30) 8773(8) 393(9) 1299(5) 71(2)

C(31) 4983(11) -2010(7) 3901(4) 64(2)

C(32) 6110(9) 3897(7) 740(3) 51(2)

C(33) 6157(10) -1819(8) 4356(4) 62(2)

C(34) 983(10) 6656(7) 2709(4) 65(2)

C(35) 6467(13) 2761(9) -506(4) 73(3)

C(36) 7585(10) 4096(8) 234(4) 66(2)

C(37) 4967(12) 2635(8) -40(4) 72(2)

C(38) 7702(12) 3504(9) -362(5) 78(3)

C(39) 9002(10) -621(9) 843(4) 78(3)

C(40) -641(14) 3842(11) 4426(5) 108(4)

C(42) -2485(17) 4093(14) 4465(9) 168(6)

Cl(4) 8096(3) -287(3) 4912(1) 98(1)

________________________________________________________________

Table S3. Bond lengths [A] and angles [deg] for **3d**.

_____________________________________________________________

Cl(1)-C(25) 1.751(6)

O(5)-C(12) 1.316(7)

O(5)-C(30) 1.477(7)

O(4)-C(12) 1.197(7)

C(5)-C(23) 1.377(8)

C(5)-C(28) 1.398(8)

C(5)-C(7) 1.502(8)

O(2)-C(22) 1.292(9)

O(2)-C(40) 1.462(8)

C(7)-C(9) 1.559(8)

C(7)-C(21) 1.573(8)

O(1)-C(13) 1.217(7)

C(9)-C(17) 1.497(8)

C(9)-C(12) 1.518(8)

C(9)-C(19) 1.539(8)

C(10)-C(25) 1.367(8)

C(10)-C(15) 1.400(8)

O(3)-C(22) 1.204(8)

C(13)-C(20) 1.490(9)

C(13)-C(19) 1.541(8)

N(2)-C(17) 1.107(7)

C(15)-C(26) 1.395(8)

C(15)-C(24) 1.498(8)

C(16)-N(1) 1.121(7)

C(16)-C(21) 1.478(9)

C(19)-C(24) 1.535(8)

C(20)-C(32) 1.380(9)

C(20)-C(37) 1.386(9)

C(21)-C(22) 1.553(8)

C(21)-C(24) 1.593(8)

C(23)-C(29) 1.427(9)

C(25)-C(27) 1.392(9)

C(26)-C(34) 1.369(9)

C(27)-C(34) 1.369(10)

C(28)-C(31) 1.396(9)

C(29)-C(33) 1.359(10)

C(29)-Cl(4) 1.698(7)

C(30)-C(39) 1.417(10)

C(31)-C(33) 1.369(10)

C(32)-C(36) 1.447(10)

C(35)-C(38) 1.363(12)

C(35)-C(37) 1.409(12)

C(36)-C(38) 1.349(11)

C(40)-C(42) 1.422(15)

C(12)-O(5)-C(30) 118.7(5)

C(23)-C(5)-C(28) 118.9(6)

C(23)-C(5)-C(7) 117.1(5)

C(28)-C(5)-C(7) 123.9(5)

C(22)-O(2)-C(40) 115.6(7)

C(5)-C(7)-C(9) 117.7(4)

C(5)-C(7)-C(21) 119.1(5)

C(9)-C(7)-C(21) 103.6(4)

C(17)-C(9)-C(12) 111.3(5)

C(17)-C(9)-C(19) 110.0(5)

C(12)-C(9)-C(19) 113.7(5)

C(17)-C(9)-C(7) 112.3(5)

C(12)-C(9)-C(7) 108.9(4)

C(19)-C(9)-C(7) 100.3(4)

C(25)-C(10)-C(15) 119.7(6)

O(4)-C(12)-O(5) 126.4(5)

O(4)-C(12)-C(9) 121.5(5)

O(5)-C(12)-C(9) 112.1(5)

O(1)-C(13)-C(20) 122.3(6)

O(1)-C(13)-C(19) 119.6(6)

C(20)-C(13)-C(19) 118.0(5)

C(26)-C(15)-C(10) 117.7(5)

C(26)-C(15)-C(24) 123.3(6)

C(10)-C(15)-C(24) 118.9(5)

N(1)-C(16)-C(21) 177.9(6)

N(2)-C(17)-C(9) 175.8(7)

C(24)-C(19)-C(9) 106.1(5)

C(24)-C(19)-C(13) 113.5(5)

C(9)-C(19)-C(13) 111.3(5)

C(32)-C(20)-C(37) 119.6(7)

C(32)-C(20)-C(13) 122.0(6)

C(37)-C(20)-C(13) 118.4(7)

C(16)-C(21)-C(22) 108.4(5)

C(16)-C(21)-C(7) 112.4(5)

C(22)-C(21)-C(7) 110.2(5)

C(16)-C(21)-C(24) 109.3(5)

C(22)-C(21)-C(24) 112.3(5)

C(7)-C(21)-C(24) 104.3(4)

O(3)-C(22)-O(2) 126.8(6)

O(3)-C(22)-C(21) 122.9(7)

O(2)-C(22)-C(21) 110.2(6)

C(5)-C(23)-C(29) 120.1(6)

C(15)-C(24)-C(19) 114.2(5)

C(15)-C(24)-C(21) 116.1(4)

C(19)-C(24)-C(21) 104.9(4)

C(10)-C(25)-C(27) 122.4(6)

C(10)-C(25)-Cl(1) 118.9(5)

C(27)-C(25)-Cl(1) 118.7(5)

C(34)-C(26)-C(15) 121.3(6)

C(34)-C(27)-C(25) 117.5(6)

C(31)-C(28)-C(5) 119.8(6)

C(33)-C(29)-C(23) 120.0(6)

C(33)-C(29)-Cl(4) 121.7(6)

C(23)-C(29)-Cl(4) 118.2(6)

C(39)-C(30)-O(5) 107.0(6)

C(33)-C(31)-C(28) 121.1(7)

C(20)-C(32)-C(36) 120.2(6)

C(29)-C(33)-C(31) 120.0(7)

C(27)-C(34)-C(26) 121.4(6)

C(38)-C(35)-C(37) 120.2(7)

C(38)-C(36)-C(32) 118.1(8)

C(20)-C(37)-C(35) 119.5(8)

C(36)-C(38)-C(35) 122.3(8)

C(42)-C(40)-O(2) 109.2(9)

_____________________________________________________________

Symmetry transformations used to generate equivalent atoms:

Table S4. Anisotropic displacement parameters (A^2 x 10^3) for **3d**.

The anisotropic displacement factor exponent takes the form:

-2 pi^2 [ h^2 a*^2 U11 + ... + 2 h k a* b* U12 ]

_______________________________________________________________________

U11 U22 U33 U23 U13 U12

_______________________________________________________________________

Cl(1) 50(1) 72(2) 140(2) -32(1) -30(1) 22(1)

O(5) 26(2) 54(3) 72(3) -17(2) 3(2) -5(2)

O(4) 40(3) 49(3) 80(3) -8(2) -23(2) -15(2)

C(5) 35(3) 40(4) 38(3) -2(3) -9(3) -1(3)

O(2) 65(4) 72(4) 59(3) -27(3) 10(3) 9(3)

C(7) 39(3) 25(3) 34(3) -2(2) -8(2) -7(2)

O(1) 58(3) 110(5) 57(3) -2(3) -24(3) -30(3)

C(9) 33(3) 31(3) 41(3) -4(3) -10(3) -7(2)

C(10) 30(3) 32(3) 64(4) -8(3) -9(3) -3(3)

O(3) 91(4) 63(3) 60(3) -23(3) -28(3) -2(3)

C(12) 34(3) 30(3) 44(3) -3(3) -4(3) -3(3)

C(13) 45(4) 48(4) 40(4) -4(3) -8(3) -3(3)

N(2) 51(4) 59(4) 68(4) -26(3) -8(3) -11(3)

C(15) 38(4) 36(3) 43(3) -5(3) -6(3) -8(3)

C(16) 35(3) 27(3) 50(4) -7(3) 3(3) -6(3)

C(17) 31(3) 35(3) 41(3) -11(3) 2(3) -7(3)

N(1) 55(4) 47(4) 77(4) -5(3) 14(3) -13(3)

C(19) 35(3) 33(3) 44(3) -5(3) -9(3) -7(2)

C(20) 54(4) 38(4) 39(4) 1(3) -7(3) 10(3)

C(21) 43(4) 30(3) 43(3) -10(3) -5(3) 4(3)

C(22) 68(5) 44(4) 49(4) -10(3) -5(4) 6(4)

C(23) 41(4) 42(4) 50(4) -10(3) -4(3) -2(3)

C(24) 36(3) 28(3) 40(3) -5(3) -6(3) 0(2)

C(25) 34(4) 39(4) 68(4) -3(3) -12(3) 5(3)

C(26) 40(4) 38(4) 83(5) -2(3) -24(3) -5(3)

C(27) 63(5) 25(4) 88(5) -9(3) -16(4) 1(3)

C(28) 62(4) 38(4) 54(4) -9(3) -22(3) -1(3)

C(29) 51(4) 62(5) 47(4) 2(4) -7(3) -5(4)

C(30) 23(4) 84(6) 101(6) -5(5) 4(4) 3(3)

C(31) 89(6) 37(4) 65(5) 2(4) -21(4) -5(4)

C(32) 54(4) 50(4) 45(4) -2(3) -6(3) 2(3)

C(33) 68(5) 56(5) 58(5) 3(4) -15(4) 11(4)

C(34) 67(5) 29(4) 105(6) -14(4) -14(4) -21(4)

C(35) 87(7) 73(6) 47(5) -10(4) 12(4) 30(5)

C(36) 52(5) 72(5) 67(5) 5(4) 8(4) -1(4)

C(37) 99(7) 62(5) 59(5) -25(4) -25(5) 10(4)

C(38) 69(6) 85(7) 64(6) -7(5) 18(4) 27(5)

C(39) 71(6) 84(6) 71(5) -15(5) 26(4) 9(4)

C(40) 117(9) 130(9) 79(6) -67(6) -3(6) 27(7)

C(42) 118(10) 152(12) 229(16) -87(11) 71(10) 7(9)

Cl(4) 88(2) 128(2) 79(2) 11(1) -32(1) -16(2)

_______________________________________________________________________

Table S5. Hydrogen coordinates ( x 10^4) and isotropic

displacement parameters (A^2 x 10^3) for **3d**.

________________________________________________________________

x y z U(eq)

________________________________________________________________

H(7) 4601 2303 3077 38

H(10) -1477 4217 2087 50

H(19) 4074 3630 1966 44

H(23) 6216 1394 3907 53

H(24) 860 2610 2085 42

H(26) 2951 5178 2698 63

H(27) -1260 7890 2640 70

H(28) 3534 -1101 3107 61

H(30A) 9067 1240 1043 85

H(30B) 9514 143 1686 85

H(31) 4647 -2863 3906 76

H(32) 6034 4246 1169 61

H(33) 6635 -2543 4658 75

H(34) 1608 7268 2866 78

H(35) 6615 2336 -912 88

H(36) 8428 4617 318 80

H(37) 4085 2182 -154 87

H(38) 8659 3607 -685 93

H(39A) 8675 -1447 1100 118

H(39B) 10199 -754 666 118

H(39C) 8288 -350 455 118

H(40A) -265 3406 4878 129

H(40B) -143 4686 4317 129

H(42A) -2924 3587 4146 252

H(42B) -2828 5035 4337 252

H(42C) -2947 3826 4938 252

________________________________________________________________

Figure **S2** Molecular structure of 1,3-dicyanocyclopentane-1,3-dicarboxylate **3g**, Non-hydrogen atoms are shown at the 30% probability level.

Table S6. Crystal data and structure refinement for **3g**.

Identification code **3g**

Empirical formula C32 H25 Br2 Cl N2 O5

Formula weight 712.79

Temperature 296 K

Wavelength 0.71073 A

Crystal system, space group Triclinic, P-1

Unit cell dimensions a = 7.184(7) A alpha = 82.01(4) deg.

b = 13.753(12) A beta = 81.42(2) deg.

c = 15.920(14) A gamma = 77.957(18) deg.

Volume 1512(2) A^3

Z, Calculated density 2, 1.566 Mg/m^3

Absorption coefficient 2.813 mm^-1

F(000) 716

Crystal size 0.35 x 0.33 x 0.3 mm

Theta range for data collection 1.30 to 25.00 deg.

Limiting indices -8<=h<=8, -16<=k<=16, -18<=l<=18

Reflections collected / unique 33488 / 5319 [R(int) = 0.0407]

Completeness to theta = 25.00 100.0 %

Refinement method Full-matrix least-squares on F^2

Data / restraints / parameters 5318 / 0 / 381

Goodness-of-fit on F^2 1.084

Final R indices [I>2sigma(I)] R1 = 0.0330, wR2 = 0.0797

R indices (all data) R1 = 0.0495, wR2 = 0.0960

Largest diff. peak and hole 0.313 and -0.456 e.A^-3

Table S7. Atomic coordinates ( x 10^4) and equivalent isotropic

displacement parameters (A^2 x 10^3) for **3g**.

U(eq) is defined as one third of the trace of the orthogonalized

Uij tensor.

________________________________________________________________

x y z U(eq)

________________________________________________________________

Br(1) 7387(1) 1601(1) 8084(1) 73(1)

Br(2) 2513(1) 838(1) 66(1) 70(1)

C(1) 7059(4) 2383(2) 4173(2) 28(1)

C(2) 6701(3) 3470(2) 3728(2) 29(1)

C(3) 6443(4) 3289(2) 2804(2) 30(1)

C(4) 4962(3) 2607(2) 3002(2) 28(1)

C(5) 5751(3) 1829(2) 3767(2) 28(1)

C(6) 7024(3) 2219(2) 5136(2) 29(1)

C(7) 7430(4) 1244(2) 5539(2) 39(1)

C(8) 7526(4) 1055(2) 6408(2) 45(1)

C(9) 7225(4) 1847(2) 6885(2) 42(1)

C(10) 6835(4) 2817(2) 6511(2) 45(1)

C(11) 6750(4) 2995(2) 5636(2) 41(1)

C(12) 4916(4) 4088(2) 4104(2) 33(1)

C(13) 8439(4) 3973(2) 3703(2) 33(1)

C(14) 9410(4) 5535(2) 3600(2) 50(1)

C(15) 8512(5) 6594(2) 3426(4) 87(2)

C(16) 5812(4) 4258(2) 2234(2) 37(1)

C(17) 7288(4) 4790(2) 1721(2) 41(1)

C(18) 6663(6) 5762(3) 1357(2) 64(1)

C(19) 7974(7) 6314(3) 905(3) 81(1)

C(20) 9882(6) 5895(3) 822(2) 69(1)

C(21) 10536(5) 4937(3) 1159(2) 63(1)

C(22) 9223(5) 4386(3) 1614(2) 51(1)

C(23) 4466(4) 2159(2) 2268(2) 30(1)

C(24) 5605(4) 2092(2) 1487(2) 46(1)

C(25) 5042(5) 1704(2) 827(2) 52(1)

C(26) 3338(4) 1367(2) 958(2) 43(1)

C(27) 2185(4) 1409(2) 1730(2) 40(1)

C(28) 2749(4) 1812(2) 2377(2) 36(1)

C(29) 7018(4) 902(2) 3397(2) 30(1)

C(30) 7206(4) -769(2) 3125(2) 40(1)

C(31) 7196(5) -681(3) 2181(2) 59(1)

C(32) 4112(4) 1559(2) 4363(2) 30(1)

Cl(1) 11544(2) 6602(1) 278(1) 112(1)

N(1) 3510(4) 4541(2) 4389(2) 48(1)

N(2) 2800(4) 1371(2) 4801(2) 50(1)

O(1) 10045(3) 3510(1) 3671(2) 51(1)

O(2) 7895(2) 4949(1) 3675(1) 39(1)

O(3) 4110(3) 4598(2) 2235(2) 60(1)

O(4) 8623(3) 910(2) 3057(1) 49(1)

O(5) 6122(3) 145(1) 3476(1) 35(1)

________________________________________________________________

Table S8. Bond lengths [A] and angles [deg] for **3g**.

_____________________________________________________________

Br(1)-C(9) 1.908(3)

Br(2)-C(26) 1.901(3)

C(1)-C(6) 1.515(4)

C(1)-C(2) 1.551(4)

C(1)-C(5) 1.580(3)

C(1)-H(1) 0.9800

C(2)-C(12) 1.478(4)

C(2)-C(13) 1.542(4)

C(2)-C(3) 1.569(4)

C(3)-C(16) 1.530(4)

C(3)-C(4) 1.532(4)

C(3)-H(3) 0.9800

C(4)-C(23) 1.512(4)

C(4)-C(5) 1.593(4)

C(4)-H(4) 0.9800

C(5)-C(32) 1.475(4)

C(5)-C(29) 1.538(4)

C(6)-C(11) 1.383(4)

C(6)-C(7) 1.396(4)

C(7)-C(8) 1.382(4)

C(7)-H(7) 0.9300

C(8)-C(9) 1.376(4)

C(8)-H(8) 0.9300

C(9)-C(10) 1.373(4)

C(10)-C(11) 1.388(4)

C(10)-H(10) 0.9300

C(11)-H(11) 0.9300

C(12)-N(1) 1.137(3)

C(13)-O(1) 1.193(3)

C(13)-O(2) 1.313(3)

C(14)-O(2) 1.466(3)

C(14)-C(15) 1.471(5)

C(14)-H(14A) 0.9700

C(14)-H(14B) 0.9700

C(15)-H(15A) 0.9600

C(15)-H(15B) 0.9600

C(15)-H(15C) 0.9600

C(16)-O(3) 1.214(3)

C(16)-C(17) 1.492(4)

C(17)-C(22) 1.380(4)

C(17)-C(18) 1.391(4)

C(18)-C(19) 1.387(5)

C(18)-H(18) 0.9300

C(19)-C(20) 1.365(6)

C(19)-H(19) 0.9300

C(20)-C(21) 1.366(6)

C(20)-Cl(1) 1.751(4)

C(21)-C(22) 1.390(4)

C(21)-H(21) 0.9300

C(22)-H(22) 0.9300

C(23)-C(24) 1.386(4)

C(23)-C(28) 1.392(4)

C(24)-C(25) 1.389(4)

C(24)-H(24) 0.9300

C(25)-C(26) 1.375(4)

C(25)-H(25) 0.9300

C(26)-C(27) 1.377(4)

C(27)-C(28) 1.383(4)

C(27)-H(27) 0.9300

C(28)-H(28) 0.9300

C(29)-O(4) 1.200(3)

C(29)-O(5) 1.316(3)

C(30)-O(5) 1.469(3)

C(30)-C(31) 1.492(5)

C(30)-H(30A) 0.9700

C(30)-H(30B) 0.9700

C(31)-H(31A) 0.9600

C(31)-H(31B) 0.9600

C(31)-H(31C) 0.9600

C(32)-N(2) 1.139(3)

C(6)-C(1)-C(2) 118.7(2)

C(6)-C(1)-C(5) 117.4(2)

C(2)-C(1)-C(5) 104.8(2)

C(6)-C(1)-H(1) 104.8

C(2)-C(1)-H(1) 104.8

C(5)-C(1)-H(1) 104.8

C(12)-C(2)-C(13) 111.3(2)

C(12)-C(2)-C(1) 112.7(2)

C(13)-C(2)-C(1) 111.8(2)

C(12)-C(2)-C(3) 108.9(2)

C(13)-C(2)-C(3) 110.6(2)

C(1)-C(2)-C(3) 101.11(19)

C(16)-C(3)-C(4) 114.3(2)

C(16)-C(3)-C(2) 113.1(2)

C(4)-C(3)-C(2) 101.12(19)

C(16)-C(3)-H(3) 109.3

C(4)-C(3)-H(3) 109.3

C(2)-C(3)-H(3) 109.3

C(23)-C(4)-C(3) 118.0(2)

C(23)-C(4)-C(5) 116.0(2)

C(3)-C(4)-C(5) 102.8(2)

C(23)-C(4)-H(4) 106.4

C(3)-C(4)-H(4) 106.4

C(5)-C(4)-H(4) 106.4

C(32)-C(5)-C(29) 111.2(2)

C(32)-C(5)-C(1) 114.0(2)

C(29)-C(5)-C(1) 108.6(2)

C(32)-C(5)-C(4) 109.1(2)

C(29)-C(5)-C(4) 108.9(2)

C(1)-C(5)-C(4) 104.82(19)

C(11)-C(6)-C(7) 117.6(3)

C(11)-C(6)-C(1) 123.1(2)

C(7)-C(6)-C(1) 119.1(2)

C(8)-C(7)-C(6) 121.5(3)

C(8)-C(7)-H(7) 119.3

C(6)-C(7)-H(7) 119.3

C(9)-C(8)-C(7) 119.1(3)

C(9)-C(8)-H(8) 120.4

C(7)-C(8)-H(8) 120.4

C(10)-C(9)-C(8) 121.0(3)

C(10)-C(9)-Br(1) 119.2(2)

C(8)-C(9)-Br(1) 119.7(2)

C(9)-C(10)-C(11) 119.2(3)

C(9)-C(10)-H(10) 120.4

C(11)-C(10)-H(10) 120.4

C(6)-C(11)-C(10) 121.5(3)

C(6)-C(11)-H(11) 119.2

C(10)-C(11)-H(11) 119.2

N(1)-C(12)-C(2) 177.8(3)

O(1)-C(13)-O(2) 126.8(2)

O(1)-C(13)-C(2) 122.3(2)

O(2)-C(13)-C(2) 110.7(2)

O(2)-C(14)-C(15) 107.2(2)

O(2)-C(14)-H(14A) 110.3

C(15)-C(14)-H(14A) 110.3

O(2)-C(14)-H(14B) 110.3

C(15)-C(14)-H(14B) 110.3

H(14A)-C(14)-H(14B) 108.5

C(14)-C(15)-H(15A) 109.5

C(14)-C(15)-H(15B) 109.5

H(15A)-C(15)-H(15B) 109.5

C(14)-C(15)-H(15C) 109.5

H(15A)-C(15)-H(15C) 109.5

H(15B)-C(15)-H(15C) 109.5

O(3)-C(16)-C(17) 121.4(2)

O(3)-C(16)-C(3) 118.9(2)

C(17)-C(16)-C(3) 119.7(2)

C(22)-C(17)-C(18) 118.8(3)

C(22)-C(17)-C(16) 123.8(3)

C(18)-C(17)-C(16) 117.4(3)

C(19)-C(18)-C(17) 120.2(4)

C(19)-C(18)-H(18) 119.9

C(17)-C(18)-H(18) 119.9

C(20)-C(19)-C(18) 119.4(4)

C(20)-C(19)-H(19) 120.3

C(18)-C(19)-H(19) 120.3

C(19)-C(20)-C(21) 121.7(3)

C(19)-C(20)-Cl(1) 119.5(3)

C(21)-C(20)-Cl(1) 118.8(3)

C(20)-C(21)-C(22) 118.8(4)

C(20)-C(21)-H(21) 120.6

C(22)-C(21)-H(21) 120.6

C(17)-C(22)-C(21) 121.0(3)

C(17)-C(22)-H(22) 119.5

C(21)-C(22)-H(22) 119.5

C(24)-C(23)-C(28) 118.1(2)

C(24)-C(23)-C(4) 123.8(2)

C(28)-C(23)-C(4) 118.1(2)

C(23)-C(24)-C(25) 121.2(3)

C(23)-C(24)-H(24) 119.4

C(25)-C(24)-H(24) 119.4

C(26)-C(25)-C(24) 119.2(3)

C(26)-C(25)-H(25) 120.4

C(24)-C(25)-H(25) 120.4

C(25)-C(26)-C(27) 121.2(3)

C(25)-C(26)-Br(2) 120.4(2)

C(27)-C(26)-Br(2) 118.4(2)

C(26)-C(27)-C(28) 119.0(3)

C(26)-C(27)-H(27) 120.5

C(28)-C(27)-H(27) 120.5

C(27)-C(28)-C(23) 121.4(3)

C(27)-C(28)-H(28) 119.3

C(23)-C(28)-H(28) 119.3

O(4)-C(29)-O(5) 125.7(2)

O(4)-C(29)-C(5) 121.7(2)

O(5)-C(29)-C(5) 112.6(2)

O(5)-C(30)-C(31) 111.0(2)

O(5)-C(30)-H(30A) 109.4

C(31)-C(30)-H(30A) 109.4

O(5)-C(30)-H(30B) 109.4

C(31)-C(30)-H(30B) 109.4

H(30A)-C(30)-H(30B) 108.0

C(30)-C(31)-H(31A) 109.5

C(30)-C(31)-H(31B) 109.5

H(31A)-C(31)-H(31B) 109.5

C(30)-C(31)-H(31C) 109.5

H(31A)-C(31)-H(31C) 109.5

H(31B)-C(31)-H(31C) 109.5

N(2)-C(32)-C(5) 177.3(3)

C(13)-O(2)-C(14) 117.0(2)

C(29)-O(5)-C(30) 116.5(2)

_____________________________________________________________

Symmetry transformations used to generate equivalent atoms:

Table S9. Anisotropic displacement parameters (A^2 x 10^3) for **3g**.

The anisotropic displacement factor exponent takes the form:

-2 pi^2 [ h^2 a*^2 U11 + ... + 2 h k a* b* U12 ]

_______________________________________________________________________

U11 U22 U33 U23 U13 U12

_______________________________________________________________________

Br(1) 86(1) 100(1) 37(1) -1(1) -18(1) -22(1)

Br(2) 104(1) 75(1) 42(1) -15(1) -26(1) -27(1)

C(1) 29(1) 21(1) 34(1) -5(1) -3(1) -4(1)

C(2) 29(1) 22(1) 35(1) -3(1) -4(1) -6(1)

C(3) 31(1) 26(1) 34(1) -1(1) -4(1) -8(1)

C(4) 30(1) 25(1) 29(1) -2(1) -2(1) -5(1)

C(5) 31(1) 23(1) 30(1) -4(1) 0(1) -8(1)

C(6) 26(1) 29(1) 34(1) -4(1) -7(1) -7(1)

C(7) 47(2) 31(2) 41(2) -3(1) -9(1) -7(1)

C(8) 52(2) 41(2) 44(2) 7(1) -13(1) -11(1)

C(9) 39(2) 59(2) 33(2) -3(1) -9(1) -14(1)

C(10) 49(2) 50(2) 40(2) -16(1) -12(1) -8(1)

C(11) 49(2) 29(1) 46(2) -5(1) -14(1) -5(1)

C(12) 34(2) 24(1) 43(2) -4(1) -10(1) -8(1)

C(13) 33(2) 28(2) 38(2) -1(1) -10(1) -8(1)

C(14) 39(2) 34(2) 83(2) -3(2) -13(2) -18(1)

C(15) 55(2) 34(2) 174(5) 6(2) -22(3) -21(2)

C(16) 42(2) 30(1) 40(2) 3(1) -10(1) -9(1)

C(17) 50(2) 40(2) 35(2) 4(1) -10(1) -17(1)

C(18) 75(2) 46(2) 66(2) 16(2) -6(2) -15(2)

C(19) 109(4) 56(2) 77(3) 26(2) -7(2) -38(2)

C(20) 94(3) 83(3) 42(2) 10(2) -4(2) -61(2)

C(21) 59(2) 91(3) 46(2) 8(2) -7(2) -37(2)

C(22) 53(2) 57(2) 46(2) 12(2) -11(2) -22(2)

C(23) 36(1) 27(1) 29(1) -1(1) -5(1) -8(1)

C(24) 49(2) 58(2) 34(2) -3(1) 3(1) -25(2)

C(25) 69(2) 64(2) 26(2) -7(1) 5(1) -27(2)

C(26) 63(2) 39(2) 31(2) -4(1) -14(1) -13(2)

C(27) 41(2) 41(2) 43(2) -8(1) -8(1) -14(1)

C(28) 36(2) 42(2) 32(1) -8(1) 0(1) -12(1)

C(29) 37(2) 24(1) 30(1) -3(1) -3(1) -8(1)

C(30) 50(2) 23(1) 47(2) -13(1) -3(1) -3(1)

C(31) 76(2) 52(2) 51(2) -21(2) -11(2) -6(2)

C(32) 36(1) 27(1) 28(1) -4(1) -3(1) -7(1)

Cl(1) 149(1) 137(1) 74(1) 16(1) 4(1) -111(1)

N(1) 38(1) 43(2) 65(2) -17(1) -13(1) 0(1)

N(2) 46(2) 60(2) 43(2) -2(1) 5(1) -19(1)

O(1) 32(1) 35(1) 87(2) -4(1) -12(1) -7(1)

O(2) 33(1) 24(1) 63(1) -4(1) -11(1) -10(1)

O(3) 44(1) 51(1) 78(2) 23(1) -17(1) -8(1)

O(4) 38(1) 41(1) 67(1) -20(1) 16(1) -12(1)

O(5) 41(1) 22(1) 43(1) -9(1) 0(1) -8(1)

_______________________________________________________________________

Table S10. Hydrogen coordinates ( x 10^4) and isotropic

displacement parameters (A^2 x 10^3) for **3g**.

________________________________________________________________

x y z U(eq)

________________________________________________________________

H(1) 8374 2094 3949 34

H(3) 7651 2920 2535 36

H(4) 3768 3014 3246 34

H(7) 7640 710 5215 47

H(8) 7791 401 6667 55

H(10) 6630 3347 6839 54

H(11) 6504 3652 5380 49

H(14A) 10401 5338 3137 60

H(14B) 9989 5426 4126 60

H(15A) 7914 6689 2912 130

H(15B) 9474 7000 3356 130

H(15C) 7562 6785 3896 130

H(18) 5362 6043 1417 77

H(19) 7558 6963 661 97

H(21) 11838 4659 1086 76

H(22) 9655 3734 1849 62

H(24) 6766 2311 1404 55

H(25) 5808 1672 302 62

H(27) 1044 1171 1814 48

H(28) 1965 1853 2897 43

H(30A) 6644 -1335 3393 48

H(30B) 8519 -887 3252 48

H(31A) 5899 -485 2050 88

H(31B) 7759 -1315 1977 88

H(31C) 7923 -187 1907 88

________________________________________________________________
